1           **Loss of retinogeniculate synaptic function in the DBA/2J mouse model of glaucoma.**

2

3   **Authors:** Jennie C. Smith<sup>1</sup>, Kevin Yang Zhang<sup>1</sup>, Asia Sladek<sup>1</sup>, Jennifer Thompson<sup>1,2</sup>, Elizabeth R. Bierlein<sup>1,2</sup>,  
4           Ashish Bhandari<sup>1,2</sup>, Matthew J. Van Hook<sup>1,3</sup>

5   **Affiliations:** <sup>1</sup>Truhlsen Eye Institute, Department of Ophthalmology & Visual Sciences, University of  
6           Nebraska Medical Center, Omaha, NE USA. <sup>2</sup>Department of Pharmacology & Experimental  
7           Neuroscience, University of Nebraska Medical Center, Omaha, NE USA. <sup>3</sup>Department of Cellular  
8           & Integrative Physiology, University of Nebraska Medical Center, Omaha, NE USA

9

10   **Declarations:**

11   Ethics approval and consent to participate: Animal studies were approved by the Institutional Animal  
12           Care and Use Committee at the University of Nebraska Medical Center.

13   Consent for publication: Not applicable

14   Availability of data and materials: The datasets used and/or analysed during the current study are  
15           available from the corresponding author on reasonable request.

16   Competing interests: The authors declare that they have no competing interests.

17   Funding:

18   NIH/NEI R01 EY030507 (MJVH)

19   Research to Prevent Blindness/The Glaucoma Foundation Career Advancement Award (MJVH)

20   University of Nebraska Medical Center Graduate Studies Fellowship (ERB, AB)

21 Funding agencies were not involved in study design, data collection, analysis, interpretation, manuscript  
22 preparation, or decision to publish.

23 Authors' contributions:

24 All authors were involved in collecting and analyzing data. MJVH drafted the manuscript and prepared  
25 figures. All authors read and approved the final manuscript.

26 Acknowledgements: Not applicable.

27

28 **Abstract**

29 Background: Retinal ganglion cell (RGC) axons comprise the optic nerve and carry information to  
30 the dorsolateral geniculate nucleus (dLGN) that is relayed to the cortex for conscious vision. Glaucoma is  
31 a blinding neurodegenerative disease that commonly results from intraocular pressure (IOP)-associated  
32 injury leading to RGC axonal pathology, disruption of RGC outputs to the brain, and eventual apoptotic  
33 loss of RGC somata. The consequences of elevated IOP and glaucomatous pathology on RGC signaling to  
34 the dLGN are largely unknown and likely to be important contributors to visual system dysfunction in  
35 glaucoma. Thus, the goal of this study was to determine how glaucoma affects RGC outputs to the dLGN.

36 Methods: We used a combination of anatomical and physiological approaches to study the  
37 structure and function of retinogeniculate synapses in male and female DBA/2J mice at multiple ages  
38 before and after IOP elevation. These included measures of anterograde axonal transport,  
39 immunofluorescence staining of RGC axon terminals, patch-clamp recording retinogeniculate (RG)  
40 synapses in living brain slices, Sholl analysis of thalamocortical relay neuron dendrites, measurements of  
41 RGC somatic density, and treatment with a topical ophthalmic alpha-2 adrenergic agonist (brimonidine).

42            Results: DBA/2J mice showed progressive loss of anterograde optic tract transport to the dLGN  
43 and vGlut2 labeling of RGC axon terminals. Patch-clamp measurements of RG synaptic function showed  
44 that the strength of synaptic transmission was lower in 9 and 12-month DBA/2J mice and that this was  
45 the result of loss of individual RGC axon contributions. TC neuron dendrites showed a reduction in  
46 complexity at 12 months, suggestive of a delayed reorganization following reduced synaptic input. There  
47 was no detectable change in RGC soma density in 11-12m DBA/2J retinas indicating that observed  
48 effects occurred prior to RGC somatic loss. Finally, treatment with brimonidine eye drops prevented the  
49 loss of vGlut2-labeled RGC terminals in the dLGN.

50            Conclusions: These findings identify glaucoma- and IOP-associated functional deficits in an  
51 important subcortical RGC projection target. This sheds light on the processes linking IOP to vision loss  
52 and will be critical for informing future diagnostic approaches and vision-restoration therapies.

53

54            **Keywords:** Glaucoma, DBA/2J, thalamus, dLGN, retinogeniculate synapse, vGlut2, brimonidine,  
55 intraocular pressure (IOP)

56

## 57            **Introduction**

58            Glaucoma is a neurodegenerative disease commonly associated with a sensitivity to intraocular  
59 pressure (IOP) and progressive degeneration of retinal ganglion cells (RGCs), the output neurons of the  
60 retina [1–3]. The goal of this study was to determine the timing and mechanisms by which IOP leads to  
61 loss of RGC output synapses (retinogeniculate/RG synapses) in the dorsolateral geniculate nucleus  
62 (dLGN), a subcortical RGC retinal projection target in the thalamus where convergent RGC synaptic  
63 inputs to thalamocortical (TC) relay neurons drive TC neuron action potential output to the visual cortex

64 for conscious, “image-forming” vision. Perturbations to dLGN function during glaucoma are likely to  
65 contribute to vision loss, yet the functional impacts of elevated IOP and glaucoma on dLGN function are  
66 poorly understood.

67         The mechanisms of visual impairment in glaucoma are commonly viewed through the lens of  
68 dysfunction progressing toward late-stage apoptotic loss of RGCs. This process occurs as the result of an  
69 IOP- and age-induced injury to RGC axons at the optic nerve head [4], where the axons exit the eye,  
70 triggering retrograde effects on RGCs and their presynaptic partners in the retina. This involves early  
71 remodeling of RGC dendrites [5–14], alterations in their intrinsic excitability and response properties [5–  
72 7,14], and reorganization of bipolar cell ribbon synapses [6,7,15,16]. However, elevated IOP also has  
73 effects that profoundly alter the function of RGC axons distal to the optic nerve head as well as to their  
74 downstream visual targets in the brain. These include disruption of optic nerve active transport [17],  
75 metabolism [18–21], and glia [22] as well as alterations to mitochondria [23], RGC excitatory output  
76 synapses [17,24], and the structure and response properties of neurons residing in visual brain nuclei  
77 [14,25]. Evidence to date indicates that many of these functional changes are relatively early events in  
78 the pathological process. We have shown previously that elevated IOP and optic nerve injury lead to  
79 changes in the strength of retinogeniculate (RG) synaptic transmission and to alterations in TC neuron  
80 dendritic structure and intrinsic excitability [25,26]. Evidence from primate and human studies indicates  
81 that glaucoma leads to dendritic remodeling and neuronal atrophy within the visual thalamus [27–30].  
82 In the superior colliculus of DBA/2J mice with inherited glaucoma, ultrastructural studies show that  
83 glaucoma leads to atrophy of presynaptic RGC axon terminals, reduced mitochondrial volume, and  
84 decreased size of presynaptic active zones [24].

85         While prior findings suggests that glaucoma can alter the function of retinal output synapses in  
86 the brain, the nature of these functional deficits, their time course, and the underlying mechanisms are  
87 largely unknown. Any disruption of visual information flow from the retina to the brain is likely to make

88 an early contribution to visual deficits triggered by increased IOP. Moreover, understanding the timing  
89 of events triggered by IOP elevation will be critical in designing approaches to assess vision loss and  
90 interventions to halt disease progression and re-establish retinal connections with central visual targets  
91 through axon regeneration and/or stem cell replacement approaches.

92 Here, we made use of the DBA/2J mouse model of glaucoma [31–33], a commonly used model  
93 system that recapitulates many key features of human glaucomatous neurodegeneration, to probe how  
94 IOP elevation leads to the loss of RGC output synapses in the dLGN. Using a combination of  
95 experimental approaches to assess optic nerve transport, RGC survival, and RG synaptic structure and  
96 function, we find that DBA/2J mice show IOP-dependent deficits in RGC axonal function that are  
97 followed by progressive loss of vGlut2-labeled RGC axon terminals in the dLGN and progressive loss of  
98 functional RGC synaptic inputs to each TC neuron. This is accompanied by late-stage reorganization of  
99 TC neuron dendrites. Notably, these deficits appear to occur prior to major RGC cell body loss, as  
100 assessed using immunofluorescence staining in retinal flat mounts. Finally, we find that treatment with  
101 an ophthalmic alpha-2 receptor agonist (brimonidine eye drops), a medication used to lower IOP in  
102 glaucoma patients that also has documented neuroprotective effects [34–37], preserves vGlut2-labeled  
103 RGC axon terminals in the dLGN. Thus, we establish the functional consequences of elevated IOP that  
104 lead to the loss of conveyance of visual signals from RGCs to their post-synaptic targets in the dLGN. The  
105 loss of functional RGC output synapses is a major feature of neurodegenerative disease progression and  
106 likely to contribute to glaucomatous vision loss.

107

## 108 **Materials and Methods**

109 Animals. Animal protocols were approved by the Institutional Animal Care and Use Committee  
110 at the University of Nebraska Medical Center. Male and female DBA/2J (D2, Jackson Labs #000671,

111 RRID:IMSR\_JAX:000671) and DBA/2J-gpnmB+ (D2-control, Jackson Labs #007048,  
112 RRID:IMSR\_JAX:007048) [33,38] were bred in-house and housed on a 12h/12h light/dark cycle with  
113 standard food and water. Intraocular pressure (IOP) was measured approximately monthly beginning at  
114 2 months of age using an iCare Tonolab rebound tonometer (iCare, Vantaa, Finland) in mice that were  
115 lightly anesthetized with isoflurane. Measurements were taken within 3 minutes of isoflurane  
116 anesthesia to minimize effects of the anesthesia on IOP. Mice were euthanized by inhalation of CO<sub>2</sub>  
117 followed by cervical dislocation, in keeping with American Veterinary Medical Association guidelines on  
118 euthanasia. A subset of mice was treated with Brimonidine tartrate eye drops (0.2%), one drop per eye  
119 4-5 days per week from approximately 6-9 months of age. A control group of mice received treatment  
120 with lubricating eye drops lacking brimonidine (Systane, Alcon).

121 *Cholera toxin beta injections and analysis.* To test for deficits in anterograde transport along the  
122 optic tract, mice received a unilateral injection of cholera toxin beta subunit coupled to Alexa Fluor 594  
123 (CTb-594, Invitrogen C34777). Mice were anesthetized with isoflurane and treated with proparacaine  
124 ophthalmic drops (1%). A Hamilton syringe and 33 gauge needle were used to deliver a unilateral  
125 intravitreal injection of ~1-2  $\mu$ L of CTb-594 (1  $\mu$ g/mL). 3-4 days post-injection, mice were euthanized  
126 with CO<sub>2</sub> asphyxiation and cervical dislocation. Brains were dissected, rinsed briefly in phosphate  
127 buffered saline (PBS), and fixed by immersion in 4% paraformaldehyde in PBS for overnight. After  
128 fixation, brains were rinsed in PBS, cryoprotected overnight in 30% sucrose, embedded in 3% agar, and  
129 sliced into 100 micron-thick slices on a Leica VT1000S vibratome. Every other section containing the  
130 dLGN was mounted on SuperFrost Plus slides (Fisher Scientific) and coverslipped with Vectashield  
131 Hardset (Vector). CTb-594 images of the contralateral dLGN were acquired using a 10x objective lens on  
132 an Olympus BX51WI microscope with a Tucsen monochrome camera. To analyze CTb-594 labeling, each  
133 image was thresholded in ImageJ based on a region outside of the dLGN and the number of CTb-594

134 pixels was counted using the histogram. In this way, the total volume of the dLGN labeled by CTb-594  
135 was calculated in serial dLGN sections for each mouse.

136 Immunofluorescence staining. Retinal ganglion cell axon terminals were labeled by  
137 immunofluorescence staining for vGlut2. After euthanasia, brains were dissected into PBS and fixed for  
138 4h in 4% PFA. Brains were then rinsed in PBS, cryoprotected overnight in 30% sucrose, embedded in 3%  
139 agar, and cut into 50 micron-thick sections using a Leica VT1000S vibratome. Sections were mounted on  
140 SuperFrost Plus slides. For staining, sections were rinsed in PBS, blocked/permeabilized with 0.5%  
141 TritonX-100, 5.5% goat serum and 5.5% donkey serum and incubated overnight with a guinea pig  
142 polyclonal vGlut2 antibody (1:250, Millipore AB2251-1, RRID:AB\_2665454). After primary antibody  
143 incubation, slices were rinsed 6x10 minutes and incubated with an AlexaFluor488-conjugated goat-anti-  
144 guinea pig IgG (1:200, Invitrogen A-11073, RRID:AB\_2534117) for 4 hours, washed 3x5 min in PBS, and  
145 coverslipped with Vectashield Hardset. vGlut2 fluorescence was imaged on a Scientifica 2-photon  
146 microscope with a MaiTai HP Ti:sapphire laser tuned to 800 nm with a 370x370 micron field of view  
147 (2.77 px/micron). The signal in a single optical section was automatically thresholded and vGlut2 puncta  
148 with a size threshold of 6  $\mu\text{m}^2$  were detected using the Synapse Counter plug-in in ImageJ [39]. For  
149 vGlut2 staining following brimonidine treatment, coronal sections containing the dLGN were stained  
150 using a rabbit polyclonal vGlut2 antibody (1:500, Cedar Lane/Synaptic Systems 135403(SY),  
151 RRID:AB\_887883) and a donkey-anti-rabbit IgG secondary conjugated to AlexaFluor568 (1:200,  
152 Invitrogen A-10042, RRID:AB\_2534017). Following staining, images were acquired with a 185x185  
153 micron field of view (5.53 px/micron).

154 For measuring retinal ganglion cell density, retinas from D2 and D2-control mice (11-12 months  
155 age) were dissected free from the eyecup in Ames solution (US Biologicals, A13722525L). Relieving cuts  
156 were made and retinas were mounted on nitrocellulose membranes, after which they were fixed in 4%  
157 PFA for 30 mins. After 3x5 minute washes in PBS, retinas were blocked/permeabilized using a solution

158 containing 1% TritonX-100, 5.5% donkey serum, 5.5% goat serum, and 0.5% dimethylsulfoxide for 1  
159 hour. Following blocking and permeabilization, retinas were incubated overnight at 4°C in the same  
160 solution containing a rabbit-anti-choline acetyltransferase (ChAT) monoclonal antibody (1:1000, Abcam  
161 ab178850, RRID:AB\_2721842) and a guinea pig-anti-NeuN polyclonal antibody (1:500, Millipore ABN90,  
162 RRID:AB\_11205592). After 6x10 minutes of washing in PBS, retinas were incubated in AlexaFluor-  
163 conjugated secondary antibodies (1:200 goat-anti-guinea pig IgG 568, Invitrogen A-11075,  
164 RRID:AB\_141954; 1:200 donkey-anti-rabbit IgG-488, Invitrogen A-21206, RRID:AB\_2535792) for 4 hours,  
165 washed 3x5 mins, mounted on SuperFrost Plus slides, and coverslipped with Vectashield Hardset. NeuN  
166 and ChAT-labeled cells in the ganglion cell layer were imaged on a 2-photon microscope in 3-4  
167 quadrants of the central retina (~500 microns from the optic nerve head) and peripheral retina (~1700  
168 microns from the optic nerve head). RGCs counts were performed using an ImageJ macro in which the  
169 maximum intensity projections were thresholded, despeckled, and inverted followed by application of  
170 the “dilate”, “fill holes”, and “watershed” commands. Finally, the Analyze Particles tool was used to  
171 detect objects with a circularity of 0.3-1 with a size threshold of 30  $\mu\text{m}^2$ . Separately, ChAT-labeled  
172 amacrine cells were counted with a circularity of 0.4-1 and a size threshold of 80  $\mu\text{m}^2$ . In a subset of  
173 images (n=9), we found that 66% of ChAT<sup>+</sup> cells detected using these parameters were also detected as  
174 NeuN<sup>+</sup>. Thus, the RGC number was taken as the difference of NeuN-labeled cells and NeuN/ChAT  
175 double-labeled cells, similar to the approach described previously [40]. Density was analyzed separately  
176 in central and peripheral retina using the mean cell counts analyzed in this manner from the 3-4 central  
177 or peripheral images for each eye.

178 Patch-clamp electrophysiology. For measurements of retinogeniculate synaptic function,  
179 parasagittal sections containing the dLGN [41,42] were prepared using the “protected recovery” method  
180 [43,44] that involved sectioning in artificial cerebrospinal fluid (aCSF; 128 NaCl, 2.5 KCl, 1.25 NaH<sub>2</sub>PO<sub>4</sub>, 24  
181 NaHCO<sub>3</sub>, 12.5 glucose, 2 CaCl<sub>2</sub>, and 2 MgSO<sub>4</sub> and continuously bubbled with a mixture of 5% CO<sub>2</sub> and



182 95% O<sub>2</sub>) followed by a 12-minute incubation in an N-methyl-D-glucamine-based solution (in mM: 92  
183 NMDG, 2.5 KCl, 1.25 NaH<sub>2</sub>PO<sub>4</sub>, 25 glucose, 30 NaHCO<sub>3</sub>, 20 HEPES, 0.5 CaCl<sub>2</sub>, 10 MgSO<sub>4</sub>, 2 thiourea, 5 L-  
184 ascorbic acid, and 3 Na-pyruvate, warmed to 33°C). After an additional >1 hour recovery in aCSF at room  
185 temperature, slices were transferred to a recording chamber on an Olympus BX51-WI upright  
186 microscope and superfused with aCSF supplemented with 60 μM picrotoxin at ~2 mL/minute bubbled  
187 with 5% CO<sub>2</sub> and 95% O<sub>2</sub> and warmed to 30-33°C with an in-line solution heater (Warner Instruments).

188 Thalamocortical (TC) relay neurons were targeted for whole-cell voltage clamp recording using a  
189 pipette solution comprised of (in mM) 120 Cs-methanesulfonate, 2 EGTA, 10 HEPES, 8 TEA-Cl, 5 ATP-Mg,  
190 0.5 GTP-Na<sub>2</sub>, 5 phosphocreatine-Na<sub>2</sub>, 2 QX-314 (pH = 7.4, 275 mOsm). Electrophysiology was performed  
191 using a Multiclamp 700B or 700A amplifier, a Digidata 1550B digitizer, and pClamp 10 or 11 software  
192 (Axon/Molecular Devices). The holding voltage was -70 mV after correction for the liquid junction  
193 potential, which was measured as 10 mV. A concentric bipolar stimulating electrode was positioned in  
194 the optic tract anterior and ventral to the ventral LGN (~1-1.5 mm from the dLGN) and used to deliver  
195 pairs of current stimuli to RGC axons from an AM Systems Model 2100 Isolated Pulse Stimulator (0.3-0.5  
196 ms, 200 ms inter-stimulus interval).

197 To measure the maximal AMPA receptor-mediated excitatory post-synaptic currents (EPSC<sub>max</sub>),  
198 representing the response evoked by all intact RGC inputs converging onto a given TC neuron [45–47],  
199 we increased stimulus intensity until the response amplitude plateaued (up to 10 mA stimulus  
200 amplitude). NMDA receptor EPSCs (EPSC<sub>NMDA</sub>) were measured as the amplitude 15 ms post-stimulus  
201 while the TC neurons were voltage clamped at +40 mV. To measure RGC convergence, the stimulus  
202 intensity was reduced until it evoked an EPSC representing the input from a single RGC axon (single-fiber  
203 EPSC, EPSC<sub>sf</sub>), defined as the EPSC amplitude recorded when a given stimulus failed to evoke a response  
204 approx. 50% of the time. The “fiber fraction” [45–47], which is an estimate of the single fiber  
205 contribution to the maximal EPSC, and thus, a metric for measuring RGC input convergence onto post-

206 synaptic TC neurons, was calculated as the ratio of the EPSC<sub>min</sub>/EPSC<sub>max</sub>. These electrophysiology data  
207 were analyzed with ClampFit 11.

208 Single-vesicle miniature EPSCs (mEPSCs) were recorded over sixty seconds in the absence of  
209 stimulation. mEPSCs were detected and amplitude and frequency were analyzed using MiniAnalysis  
210 software (Synaptosoft, Fort Lee, NJ, USA) with an amplitude threshold of 4.5 pA. Fits of mEPSC  
211 amplitude and baseline noise histograms revealed good separation of mEPSCs from the noise with these  
212 detection parameters.

213 Single-neuron dye fills and dendritic reconstruction. For single-neuron dendritic reconstructions,  
214 TC neurons were targeted for whole-cell patch clamp recording in 250 micron-thick coronal sections  
215 prepared using the protected recovery method, as described above. The pipette solution was either the  
216 Cs-methanesulfonate solution, as above, or was a K-gluconate solution (in mM, 120 K-gluconate, 8 KCl, 2  
217 EGTA, 10 HEPES, 5 ATP-Mg, 0.5 GTP-Na<sub>2</sub>, 5 Phosphocreatine-Na<sub>2</sub>) supplemented with 2% Neurobiotin  
218 (Vector Laboratories, SP-1120) and 10 μM CF568 (Biotium). Neurobiotin and CF568 were injected using  
219 square-wave current injections (500 pA peak to trough, 2 Hz) for 10-15 minutes in current clamp mode,  
220 after which slices were fixed in 4% PFA for 1h and incubated for a week in 10 ug/mL streptavidin-568 in  
221 PBS with 1% TritonX-100 at 4°C. After incubation, slices were washed 3x 10 min in PBS, mounted on  
222 Superfrost Plus slides and coverslipped with Vectashield Hardset (Vector Laboratories, H-1400). Filled TC  
223 neurons were imaged on a 2-photon microscope and dendrites were reconstructed using Simple Neurite  
224 Tracer plug-in in ImageJ. Sholl analysis was performed in ImageJ on a 2-dimensional projection of the  
225 reconstructed dendrites (10 μm spacing between Sholl rings). Equivalent dendritic field diameter was  
226 calculated from the area of a convex polygon drawn by connecting TC neuron dendritic tips in ImageJ.

227 Statistics. Statistical analysis was performed using GraphPad Prism 9. Normality of the data was  
228 assessed using a D'Agostino & Pearson test. When data were normally distributed, significance was

229 assessed using a One-Way Analysis of Variance with Dunnett's multiple comparison tests. To avoid  
230 pitfalls from pseudoreplication [48], statistical significance was measured using one-way nested ANOVA  
231 with a Dunnett's multiple comparisons post-hoc test when we made multiple measurements from single  
232 animals (i.e., multiple cells from each mouse in a dataset). Nested data sets that followed a logarithmic  
233 distribution were log transformed prior to statistical testing. For all statistical tests,  $p < 0.05$  was  
234 considered statistically significant. Sample sizes (number of mice and the number of cells), statistical  
235 tests, and p-values are reported in the figure legends. Data are displayed as individual data points and  
236 mean  $\pm$  standard error of the mean (SEM) or median  $\pm$  inter-quartile range (IQR), as indicated in figure  
237 legends

238

## 239 **Results**

240 To determine how IOP elevation in DBA/2J mice influences the dLGN, we performed  
241 experiments to longitudinally monitor IOP and assess anterograde axoplasmic transport of fluorescently-  
242 tagged cholera toxin beta (CTb) subunits (Figure 1). D2 mice showed an increase in IOP (n = 168 eyes, 84  
243 mice) beginning at approximately 7 months of age. IOP elevation was variable, as we and others have  
244 reported previously. Compared to DBA/2J-gpnb<sup>+</sup> (D2-control mice, n = 110 eyes, 55 mice), IOP was  
245 significantly elevated after 8 months. Notably, IOP in D2 mice was significantly lower than in D2-controls  
246 at 5 months and 6 months (Figure 1 B&C), similar to what we have observed previously [49] and is  
247 apparent in figures from other prior studies [32,50,51]. While female DBA/2J mice had, on average,  
248 higher IOP than males at ages >8 months, consistent with prior work [32], the male and female IOP  
249 measurements overlapped considerably. Using serial histological sections of the dLGN, we quantified  
250 the total fraction of dLGN labeled by anterogradely-transported CTb-594 (Figure 1D&E). Approximately  
251 80% of the dLGN was labeled in D2-control mice, which was similar to the amount labeled in 4 month-

252 old D2 mice and was the result of complete labeling from contralateral projections and no labeling in the  
253 ipsilateral projection region. By 9 months of age,  $29 \pm 1\%$  of the dLGN was labeled, and the pattern  
254 appeared to be the result of regional loss of transport, similar to what has been documented for the  
255 superior colliculus. There was also a weak but statistically significant correlation of CTb-594 labeling with  
256 the summed IOP measurements taken for the two months prior to tissue collection (Figure 1F),  
257 suggesting a functional link between IOP and deficits in anterograde transport to the dLGN.

258           To test the influence of age and IOP on RGC axon terminals, we next immunostained dLGN  
259 sections for vGlut2 (Figure 2). In these experiments, the density of vGlut2-labeled puncta was  
260 comparable between D2-control and 4 month-old D2 mice. In older D2 mice, the density of vGlut2-  
261 labeled puncta showed a progressive reduction, being lower in 9m and lower still in 12m D2 mice. To  
262 better understand the relationship between loss of vGlut2 puncta and deficits in anterograde transport  
263 to the dLGN, we performed vGlut2 immunofluorescence staining on dLGN sections that had also been  
264 labeled via anterograde CTb transport (Figure 2C-F). We compared vGlut2 density in regions of 9m D2  
265 dLGN with intact CTb labeling (“CTb-intact”) with dLGN regions that had little CTb labeling (“CTb-  
266 deficient”). In this experiment, we found that CTb-deficient regions of the dLGN also had lower vGlut2  
267 puncta density compared to vGlut2 density in the CTb-intact regions. However, this was not a one-to-  
268 one relationship; while there was a correlation of CTb labeling intensity with vGlut2 puncta density,  
269 regions with very little CTb still had labeling for vGlut2. This suggests that loss of vGlut2 signal could be  
270 due to either diminished vGlut2 transport from the dLGN or due to degeneration of RGC axon terminals.

271           The above data imply that impaired axonal function (as indicated by reduction in anterograde  
272 transport) is related to an impairment of a presynaptic structural marker of RG synapses (vGlut2).  
273 Therefore, we next sought to determine the consequences of elevated IOP on RG synaptic function by  
274 performing whole-cell voltage-clamp recordings of dLGN TC neurons in a parasagittal slice preparation.  
275 First, we recorded mEPSCs in the absence of stimulation in D2-control and D2 mice at 6, 9, and 12

276 months of age (Figure 3). We found that mEPSC amplitude was not significantly different between  
277 groups, suggesting that there was no detectable alteration in AMPA receptor properties or composition  
278 at RG synapses. However, there was a statistically significant difference in mEPSC frequency between  
279 groups. While it was similar in D2-controls and 6m D2 mice, there was a significant reduction in mEPSC  
280 frequency compared to controls at 9m and 12m of age, similar to what we have shown in coronal  
281 sections in D2 mice and mice with IOP elevation from anterior chamber microbead injections.

282           A reduction in mEPSC frequency can be attributed to a reduction in the number of functional  
283 synapses and/or a reduction in the probability of vesicle release. To probe these possibilities, we used a  
284 stimulating electrode positioned in the optic tract to stimulate RGC axons while we recorded the AMPA  
285 receptor-mediated EPSCmax (Figure 4), which represents the contributions from all intact axons  
286 converging onto a given TC neuron. In these experiments, we found that there was a statistically  
287 significant difference in EPSCmax between groups, with a detectable reduction in EPSCmax in slices from  
288 12 month-old D2 mice compared to controls (Figure 4A-C). There was a weak but statistically significant  
289 correlation of  $\text{Log}_{10}(\text{EPSCmax})$  (averaged across cells in each mouse) with the cumulative IOP  
290 measurements taken prior to conducting electrophysiology experiments ( $R^2=0.23$ ,  $p=0.013$ ). The lower  
291 EPSC amplitude was mirrored when we recorded NMDA receptor-mediated EPSCs ( $\text{EPSC}_{\text{NMDA}}$ ) by  
292 changing the holding potential to +40 mV (Figure 4D). There was no significant change in the  
293 AMPA/NMDA (Figure 4E) ratio suggesting no changes in the relative contributions of each receptor type  
294 at RG synapses or “silent synapses” contributing to the reduced EPSC amplitude. When we delivered a  
295 pair of stimuli to the optic tract (200 ms inter-stimulus interval), we found that there was a statistically  
296 significant difference among the groups, with an increase in the ratio of the second response to the first  
297 (Paired pulse ratio/PPR;  $\text{EPSC}_2/\text{EPSC}_1$ ) detectable in 12m D2 mice compared to controls (Figure 4F). In  
298 some cases, the PPR was  $>1$ , which represents a shift from the synaptic depression more typical for RG

299 synapses to a mode of synaptic facilitation, suggestive of a decrease in presynaptic vesicle release  
300 probability.

301           When we reduced the stimulus amplitude to evoke synaptic vesicle release from a single RGC  
302 axon, we found that there was no significant difference in the EPSCsf among groups (Figure 4G&H). The  
303 ratio of EPSCsf/EPSCmax (the “fiber fraction”) has been used to monitor the developmental refinement  
304 of RGC inputs onto TC neurons and represents a statistically quantifiable estimate of synaptic  
305 convergence [45–47]. We found that EPSCsf/EPSCmax was significantly increased in 12m D2 mice  
306 compared to controls, indicating a reduction in the number of functional RGC axon inputs onto each TC  
307 neuron.

308           Taking the reciprocal of the fiber fraction suggests that each TC neuron receives inputs from an  
309 average 6.9 RGC axons in control mice, while 12m D2 mice receive an average of 2.3 functional RGC  
310 axon inputs. At the same time point, we detected a reduction in mEPSC frequency by 18 Hz; control  
311 mEPSC frequency was 37 Hz while it was 19 Hz in 12m D2 mice. Comparison with published anatomical  
312 studies of RG synapses points to the congruence of these two measurements [52,53]; if each RGC axon  
313 contributes 15 boutons to a post-synaptic TC neuron, each with 27 active zones having a spontaneous  
314 vesicle fusion rate of 0.01 Hz per active zone [54], then the expected result of a drop from 6.9 RGC  
315 axonal inputs to 2.3 inputs is an 18 Hz reduction in mEPSC frequency. This indicates that the change in  
316 synaptic transmission measured with both mEPSCs and optic tract stimulation are of a similar scale and  
317 likely to represent complementary measures of a similar pathological process.

318           The above findings show a loss of vGlut2-labeling of RGC axon terminals and diminished  
319 numbers of RGC inputs to each TC neuron in older DBA/2J mice. However, post-synaptic TC neuron  
320 structure and function are likely to be altered in glaucoma as well. For instance, elevated IOP is  
321 associated with altered TC neuron intrinsic excitability and somatic atrophy. Prior studies have also

322 reported reorganization of LGN neuron dendrites in late-stage glaucoma in primates [27,55,56] and we  
323 have previously shown changes in TC dendritic structure following bilateral enucleation [26], a traumatic  
324 form of optic nerve injury, and IOP elevation with microbead injections [14]. Here, we performed Sholl  
325 analysis of TC neuron dendrites reconstructed after neurobiotin filling during whole-cell recording and  
326 found that although TC neuron dendritic complexity was comparable between control and 9m D2 mice,  
327 there was a modest reduction in the peak number of Sholl intersections in 12m D2 mice compared to  
328 controls (Figure 5). There was no statistically significant difference in dendritic field diameter among the  
329 groups. Thus, reorganization of post-synaptic TC neuron structure accompanies loss of function RG  
330 synaptic inputs.

331 We next sought to count the number of RGC somata in DBA/2J retinas to provide another  
332 comparison of the above findings with a commonly used metric of glaucomatous progression (Figure 6).  
333 Some commonly used markers for RGC somata such as RBPMS or Brn3 appear to undergo expression  
334 changes in DBA/2J retinas, meaning that using them to measure RGC somatic degeneration might lead  
335 to undercounts of RGC density and consequent over-estimation of RGC somatic degeneration [40,57–  
336 59]. The use of the neuronal marker NeuN, in conjunction with correction of counts for NeuN-positive  
337 cholinergic amacrine cells in the ganglion cell layer (identified by labeling for choline acetyltransferase;  
338 ChAT) is a reliable way of counting RGCs and has been used previously to show that somatic loss is a late  
339 event in DBA/2J mice [2,40]. We found that the density of ChAT<sup>+</sup> cells in the RGC layer was not  
340 significantly different between D2 and D2-control mice (11-12 months age), although it was slightly  
341 lower than previously reported in C57Bl/6J and A/J mice, which likely reflects strain differences [60,61].  
342 We measured the density of NeuN<sup>+</sup> presumptive RGCs by correcting for ChAT<sup>+</sup>/NeuN<sup>+</sup> double-labeled  
343 cells, finding that there was no significant difference in the density of NeuN<sup>+</sup> RGCs. This is consistent  
344 with prior work suggesting that RGC somatic loss is a late event in DBA/2J mice [40].

345 Finally, we tested whether treatment with IOP-lowering medication could prevent effects on  
346 dLGN synaptic structure in D2 mice (Figure 7). To do this, we treated a subset of DBA/2J mice with  
347 brimonidine eye drops daily for 4-5 days per week from approximately 6 months to 9 months of age  
348 prior to harvesting tissue. IOP measurements in 7-9-month old DBA/2J mice showed treatment was  
349 followed by an acute  $5.6 \pm 1.4$  mmHg reduction in IOP (Figure 7C;  $n = 20$  eyes, 10 mice;  $p = 0.0011$ ).  
350 Brimonidine has been shown to reduce IOP in mice over a 24-hour period [62] but drug effects do wash  
351 out over time. Indeed, IOP values taken earlier in the day, prior to brimonidine administration were  
352 similar in brimonidine-treated eyes compared to those receiving only lubricating eye drops and this was  
353 evidenced by similar IOP values at the 8-8.5m time point ( $23.2 \pm 2.3$  mmHg for lubricating eye drops  
354 group and  $22.8 \pm 1.7$  for brimonidine group;  $p=0.88$ ). Ultimately, treatment with brimonidine reduced the  
355 loss of vGlut2-labeled axon terminals (Figure 7D-F); we found vGlut2 density was higher in dLGN from  
356 brimonidine treated mice relative to those receiving only lubricating eye drops ( $p=0.0041$ ).

357

## 358 **Discussion**

359 The results here demonstrate a loss of retinal ganglion cell output synapses in the dLGN in a  
360 mouse model of glaucoma occurring prior to degeneration of RGC somata. This appears to involve the  
361 drop-off of individual RGC axon inputs to post-synaptic TC neurons without appreciable alterations in  
362 the strength of individual RGC synapses. Notably, we find that IOP elevation is associated with a  
363 diminishment of anterograde optic tract transport to the dLGN and loss of vGlut2-labeling of RGC  
364 synaptic terminals. The transport deficits were associated with diminished vGlut2 labeling, although the  
365 loss of transport was more severe than the loss of vGlut2, suggesting that compromised axonal function  
366 precedes the loss of vGlut2 labeling. These pre-synaptic effects were followed by modest loss of  
367 dendritic complexity in proximal regions of TC neuron dendritic arbors, which might represent a



368 disruption of dendritic homeostasis due to diminished retinogeniculate synaptic inputs. Finally,  
369 treatment with brimonidine eye drops over a period of three months beginning slightly prior to eye  
370 pressure elevation in D2 mice saved the vGlut2 labeling, highlighting the potential for therapeutic  
371 interventions to modulate synaptic dysfunction in the dLGN.

372 In DBA/2J mice, we found that mEPSC frequency recorded from TC neurons was reduced, which  
373 is consistent with what we have found previously using coronal slices from D2 mice or mice with  
374 experimentally-elevated IOP [14,25]. The use of fiber fraction measurements of RGC convergence in  
375 control mice were consistent with values obtained previously [45–47]. These measurements showed  
376 that TC neurons from 12m D2 mice receive inputs from fewer RGCs than observed in controls. While the  
377 mEPSC results would be consistent with several scenarios including loss of synaptic contacts made by  
378 each RGC axon or weakening of individual inputs, our data obtained with optic tract stimulation do not  
379 indicate a change in the number of bouton contacts or a major change in the strength of individual  
380 synapses, as either process would be reflected in a reduction in the EPSCsf, which we did not find. This  
381 instead largely results from drop-off of individual RGC axons, as evidenced by the increase in fiber  
382 fraction and no statistically detectable change in single fiber strength.

383 Our vGlut2 labeling studies likewise align with this picture; namely, they show a diminishment of  
384 vGlut2 labeling apparent at 9 months and to a greater extent at 12 months. vGlut2 is thought to be a  
385 relatively specific marker of RGC axon terminals in the dLGN as vGlut2 labeling is generally lost following  
386 enucleation [26,63–67]. We found that vGlut2 density was related to the extent of anterograde  
387 transport in dLGN regions with intact or deficient CTb labeling but that a considerable amount of vGlut2  
388 was still present even in regions with minimal CTb. This is consistent with the notion that loss of RGC  
389 axon terminal labeling lags transport deficits in the dLGN. Studies of the superior colliculus, another  
390 major RGC projection target, showed pronounced CTb transport labeling deficits despite intact vGlut2  
391 labeling in D2 mice [17].

392           We hypothesize that loss of vGlut2 labeling results from deficient anterograde transport, albeit  
393 with a delay relative to CTb transport deficits, and that the terminals themselves remain even after total  
394 loss of vGlut2 immunopositivity. Synaptic proteins are either translated in the soma and actively  
395 transported to presynaptic terminals or are produced as the result of local axon terminal translation  
396 from mRNAs transported from the soma [68]. Presynaptic proteins have a slow turnover relative to  
397 other cellular proteins [69,70] and the pace of this process, in concert with intact local translation, could  
398 account for the persistence of vGlut2 labeling in regions deficient in anterograde transport.

399           Ultrastructural studies of the D2 superior colliculus (SC) show that RGC axon terminals persist in  
400 regions deficient for transported CTb [17] although they have altered ultrastructural properties including  
401 atrophied terminal size, misshapen mitochondria, and smaller active zones [24]. This might reflect loss  
402 of synaptic function despite the structural persistence of the terminals. Moreover, vGlut2 is important  
403 for loading glutamate into presynaptic vesicles, so loss of vGlut2 would lead to compromised synaptic  
404 function. vGlut2 expression also appears to regulate vesicle release probability [71], which might  
405 contribute to the changes in PPR. Notably, we did not detect any statistically significant differences in  
406 vGlut2 punctum size between transport intact and deficient regions at the level of light microscopy in  
407 the dLGN. While this might represent a contrast with the RGC axon terminal pathology in the SC [24],  
408 future ultrastructural studies along measurements of mitochondrial function will be necessary to test  
409 this in the dLGN. If the effects on RGC terminals in the SC apply to those in the dLGN, deficits in  
410 anterograde transport likely correspond to compromised axonal health and consequent loss of synaptic  
411 function, although we have not yet tested this possibility.

412           In addition to the presynaptic deficits (diminished vGlut2 labeling and anterograde transport,  
413 drop-off of RGC axon synaptic output, etc.), we also show that TC neurons in aged D2 mice display  
414 reorganization of their post-synaptic dendrites. Such dendritic reorganization is a common feature of  
415 neurodegenerative diseases [72]. Prior evidence from primate LGN has identified some dendritic loss in

416 glaucoma [27,55,56] and we have previously found reductions in TC neuron dendritic complexity  
417 following experimental IOP elevation with microbeads and following bilateral enucleation [14,26].  
418 Retinal input is important for organization of TC neuron dendrites, as evidenced by studies with mice  
419 that fail to develop retinogeniculate projections [73,74]. Here, in 12m D2 mice, we find reduced  
420 complexity in regions of TC neuron dendritic arbors proximal to the soma. This region of the TC neuron  
421 dendrites has a higher concentration of retinogeniculate “driver” inputs compared to the distal  
422 dendrites [53,75], where there is a greater concentration of “modulator” excitatory inputs arising from  
423 corticothalamic feedback synapses. Synaptic inputs are important for dendritic maintenance, with  
424 deafferentation or reduced synaptic strength being salient triggers for dendritic loss [72,76,77]. This is a  
425 potentially important role of spontaneous synaptic transmission, with mEPSCs serving a homeostatic  
426 role for synaptic maintenance. Thus, it is likely that dendritic loss here is primarily a response to rather  
427 than a cause of diminished retinogeniculate synaptic strength. It remains to be tested, however,  
428 whether the loss of postsynaptic dendritic complexity is preceded by loss of postsynaptic contacts (i.e.  
429 PSD-95 puncta) in D2 TC neurons.

430           Finally, what is the relationship between dLGN synaptic function and RGC somatic  
431 degeneration? Vision impairment in glaucoma is sometimes linked with RGC apoptosis, although  
432 numerous degenerative events in each of the RGC “compartments” - somatic/dendritic, optic tract, and  
433 axon terminal – precede detectable somatic loss. Additionally, measurements of RGC somatic loss are  
434 often complicated by challenges arising from labeling approaches and no labeling method is without  
435 drawbacks. For instance, commonly used RGC-labeling antibody markers such as RBPMS or Brn3 appear  
436 to have reduced expression in D2 retinas [57–59], which might lead to undercounting RGCs and over-  
437 estimating degeneration. Likewise, identification of RGCs via retrograde labeling can be confounded by  
438 optic nerve transport deficits [78], leading to similar over-estimations of degeneration. Here, we used an  
439 immunofluorescence approach that has been employed previously to count RGCs in D2 mice, which

440 showed that that RGC loss in D2 mice is a late event, not occurring until after approximately 15 months  
441 of age. Consistent with this, we found no detectable RGC loss in 11-12-month-old D2 mice in our colony,  
442 indicating that loss of RGC output synaptic function in the dLGN occurs prior to loss of RGC somata in  
443 the retina. While our results indicate that loss of dLGN vGlut2 labeling and RGC synaptic function occurs  
444 prior to RGC somatic degeneration, RGCs undergo numerous other structural and functional changes  
445 prior to somatic loss in D2 mice. These include altered dendritic complexity and synapse loss [5–  
446 7,9,10,26], enhanced intrinsic excitability [5–7], altered light responses [5–7], disrupted metabolic  
447 function [21,79], optic nerve atrophy and gliosis, etc. Thus, the results of the current study support the  
448 body of evidence indicating that pathological changes to visual system structure and function prior to  
449 RGC somatic loss – in this case, diminishment of visual information transfer at the retinogeniculate  
450 synapse – contribute to visual impairment in glaucoma.

451 Limitations and future directions. There are several limitations with the current study and areas  
452 for future exploration. First, electrophysiology studies were conducted in the presence of picrotoxin to  
453 isolate excitatory inputs from feed-forward or feedback inhibitory circuits in the dLGN. Consequences of  
454 glaucoma on dLGN inhibitory circuits remain to be explored and understanding the nature of such  
455 influences will be important for a more complete picture of dLGN function. Second, as discussed above,  
456 these results do not differentiate whether glaucoma leads to degenerative loss of synapses at this time  
457 point, as loss of vGlut2 labeling likely results from deficits in axon transport. Moreover, while we show  
458 that TC neurons lose post-synaptic dendritic complexity in 12m D2 mice, we do not know whether this is  
459 preceded by a loss of post-synaptic sites (such as PSD95 puncta) that might contribute to the diminished  
460 synaptic strength. Ultrastructural studies of both pre- and post-synaptic contacts will be needed to  
461 ascertain whether these structures remain intact. Third, differences in dLGN regions receiving input  
462 from RGC axons with intact vs. deficient CTb transport might contribute to the variability in  
463 measurements of synaptic function we show here. Our data point to a relationship between axon

464 transport integrity and vGlut2 and prior work has shown that transport integrity deficits are related to  
465 defects in ultrastructure of presynaptic RGC axon terminals in the SC [17,24,78]. We have not yet  
466 explored the link between transport integrity and synaptic function in the dLGN. Fourth, while we show  
467 that treatment with brimonidine saves RGC axon terminals, we do not yet know whether this is due to  
468 brimonidine reducing IOP, to its neuroprotective effects, or to both [34–37,80–82]. We also have not yet  
469 explored the consequences of brimonidine treatment on other parameters such as electrophysiological  
470 measures of synaptic function or anterograde transport, although Lambert et al. have shown previously  
471 that systemic brimonidine administration prevents anterograde transport deficits and other changes in  
472 RGC morphology and optic nerve function [34]. Additionally, our experimental design with brimonidine  
473 involved treatment beginning prior to IOP elevation, so it will be important to determine if such  
474 treatments can reverse pathology if started at a later time point. Finally, while we have shown  
475 previously that TC neurons become more excitable in glaucoma [25], which might represent a  
476 homeostatic attempt to maintain thalamocortical information transfer following diminished  
477 retinogeniculate synaptic strength, we have not yet explored the consequences of these two  
478 phenomena operating in concert; it is possible that enhanced TC neuron excitability serves to maintain  
479 signaling to the visual cortex until a tipping point in the disease process after which the fidelity of visual  
480 signaling is impaired.

481

## 482 **Figure Legends**

### 483 **Figure 1 – Elevated intraocular pressure and deficits in anterograde transport to the dLGN. A)**

484 Intraocular pressure (IOP) measurements from DBA/2J-gpnm<sup>b</sup>+ (D2-control) mice (n = 110 eyes from 55

485 mice included in this study). **B)** IOP measurements from DBA/2J (D2) mice (n = 168 eyes from 84 mice).

486 **C)** Mean ( $\pm$  SEM) IOP measurements from D2 and D2-control eyes. Unpaired t-tests: 2m (month)

487  $p=0.0038$ ; 3m  $p=0.13$ ; 4m  $p=0.78$ ; 5m  $p=1.0 \times 10^{-10}$ ; 6m  $p=2.3 \times 10^{-14}$ ; 7m  $p=0.14$ ; 8m  $p=6.6 \times 10^{-9}$ ; 9m  
488  $p=4.0 \times 10^{-11}$ ; 10m  $p=1.3 \times 10^{-9}$ ; 11m  $p=2.5 \times 10^{-5}$ . **D)** Fluorescently-tagged cholera toxin-beta (CTb) was  
489 injected unilaterally and the area of labeled contralateral dLGN was measured based on fluorescence  
490 signal in serial dLGN sections. **E)** Group data (mean  $\pm$  SEM) showing fraction of CTb-labeled dLGN. There  
491 was a significant difference among groups (one-way ANOVA,  $p=5.2 \times 10^{-6}$ ) and the 12m group significantly  
492 differed from the control group (Dunnett's multiple comparison test;  $p < 1 \times 10^{-15}$ ). **E)** For the D2 mice,  
493 there was a significant negative correlation (linear regression with 95% confidence interval) of the  
494 fraction of dLGN labeled by CTb with the sum of the two IOP measurements taken prior to tissue  
495 collection (Pearson correlation,  $p=0.0032$ ).

496

497 **Figure 2 – Loss of vGlut2 labeled RGC axon terminals in the dLGN is associated with transport deficits**

498 **in DBA/2J mice.** **A)** Single optical sections of dLGN labeled with an anti-vGlut2 antibody from a D2-  
499 control mouse and D2 mice at 4m, 9m, and 12m of age. **B)** Group data (mean  $\pm$  SEM) showing density of  
500 detected vGlut2 puncta. There was a significant difference among groups (one-way ANOVA,  $p=8.0 \times 10^{-6}$ )  
501 with 9m and 12m groups differing significantly from the control group (Dunnett's multiple comparison:  
502 4m  $p=0.98$ ; 9m  $p=0.0070$ ; 12m  $p < 1 \times 10^{-15}$ ). **C)** Analysis of vGlut2 density in regions of the dLGN with  
503 intact or deficient anterograde transport of unilaterally-injected CTb. **D)** Quantification (mean  $\pm$  SEM) of  
504 CTb pixel intensity in "intact" or "deficient" dLGN regions ( $p=0.0065$ , paired t-test). **E)** Quantification of  
505 vGlut2 density (mean $\pm$ SEM) in dLGN regions with intact or deficient CTb labeling ( $p=0.041$ , paired t-test).  
506 **F)** Significant positive correlation (linear regression with 95% confidence interval) of vGlut2 density with  
507 intensity of CTb labeling (Pearson correlation,  $p=0.011$ ).

508

509 **Figure 3 – Progressive loss of miniature excitatory post-synaptic currents recorded from dLGN**  
510 **thalamocortical relay neurons in DBA/2J mice.** **A)** Recording schematic of optic tract (OT), ventral  
511 lateral geniculate nucleus (vLGN), and dLGN with patch clamp electrode in parasagittal slice. **B)** Left:  
512 Example 5-second duration traces of miniature excitatory post-synaptic currents (mEPSCs) recorded in  
513 the absence of stimulation from D2-control and D2 mice. Right: average of the detected mEPSC  
514 waveforms. **C)** Group data (median  $\pm$  IQR) of mEPSC frequency. There was a significant difference among  
515 groups (nested one-way ANOVA,  $p=0.0021$ ) and 9-month and 12-month groups differed significantly  
516 from control (Dunnett's multiple comparison: 6m  $p=0.99$ ; 9m  $p=0.026$ ; 12m  $p=0.0078$ ). **D)** Group data  
517 (median  $\pm$  IQR) of mEPSC amplitude. There was no significant difference among groups (nested one-way  
518 ANOVA,  $p=0.19$ ) and individual groups not significantly different from the control (Dunnett's multiple  
519 comparison, 6m  $p=0.24$ ; 9m  $p=0.29$ ; 12m  $p=0.21$ ). Group sizes: control  $n=48$  cells, 13 mice; 6m  $n=28$   
520 cells, 7 mice; 9m  $n=20$  cells, 8 mice; 12m  $n=33$  cells, 10 mice.

521

522 **Figure 4 – Progressive loss of convergent retinal inputs to dLGN relay neurons in DBA/2J mice.** **A)**  
523 Recording schematic of optic tract (OT) with stimulating electrode, ventral lateral geniculate nucleus  
524 (vLGN), and dLGN with patch clamp electrode in parasagittal slice. **B)** Example maximal AMPA- and  
525 NMDA-receptor-mediated EPSCs recorded at  $-70$  mV and  $+40$  mV, respectively, following maximal  
526 stimulation of the optic tract with a pair of pulses (200 ms inter-stimulus-interval). **C)** Group data of the  
527 AMPA-receptor-mediated EPSC<sub>max</sub> shows that the EPSC differed among the groups (nested one-way  
528 ANOVA,  $p= 2.4 \times 10^{-5}$ ). The EPSC<sub>max</sub> was significantly smaller amplitude in recordings from 12m D2 mice  
529 compared to controls (Dunnett's multiple comparison test: 6m  $p=0.77$ ; 9m  $p=0.16$ ; 12m  $p<1 \times 10^{-15}$ ). **D)**  
530 The NMDA-receptor-mediated EPSC differed among groups (nested one-way ANOVA,  $p=3.6 \times 10^{-5}$ ) and  
531 the 12m amplitudes were significantly lower than control (Dunnett's multiple comparison: 6m  $p=0.97$ ;  
532 9m  $p=0.54$ ; 12m  $p<1 \times 10^{-15}$ ). **E)** The AMPA/NMDA ratio did not significantly differ across groups (nested

533 one-way ANOVA,  $p=0.34$ ). **F**) Paired pulse ratio differed among groups (nested one-way ANOVA,  
534  $p=0.0011$ ) and was significantly higher in 12m D2 mice compared to controls (Dunnett's multiple  
535 comparison: 6m  $p=0.75$ ; 9m  $p=0.79$ ; 12m  $p=0.0040$ ). C-F) Show median  $\pm$  IQR. Sample sizes: Control,  
536  $n=40-46$  cells, 12-14 mice; 6m  $n=21$  cells, 7 mice; 9m  $n=21$  cells, 9 mice; 12m  $n=29-31$  cells, 10 mice. **G**)  
537 Example maximal EPSCs and single-fiber EPSCs (EPSCsf) from a control and 12m D2 mouse. **H**) The  
538 single-fiber EPSC amplitude (median  $\pm$  IQR) did not differ among groups (nested one-way ANOVA,  
539  $p=0.49$ ). **I**) The "fiber fraction" (EPSCsf/EPSCmax; median  $\pm$  IQR) differed among groups (nested one-way  
540 ANOVA,  $p=0.0038$ ) and the 12m value was significantly different from control (Dunnett's multiple  
541 comparison; 6m  $p=0.99$ , 9m  $p=0.16$ ; 12m  $p=0.0022$ ).

542

543 **Figure 5 – Thalamocortical neuron dendritic remodeling in DBA/2J mice. A-C)** Reconstructed TC  
544 neurons from D2-control (A), 9m D2 (B), and 12m D2 (C) mice filled with Neurobiotin during whole-cell  
545 recording in coronal slices. **D-F)** Sholl plots of each TC neuron included in sample. **G)** Group data (mean  $\pm$   
546 SEM) of Sholl plots. **H)** Group data (mean  $\pm$  SEM) of the peak number of Sholl intersections for each cell.  
547 There was a significant difference among groups (nested one-way ANOVA,  $p=0.0033$ ) and the 12m peak  
548 intersections was significantly lower than control (Dunnett's multiple comparison, 9m  $p=0.46$ ; 12m  
549  $p=0.0019$ ). **I)** Group data (mean  $\pm$  SEM) of the dendritic field diameter measured as the equivalent  
550 diameter of a convex polygon of the dendritic field. There was no statistically significant difference  
551 among groups (nested one-way ANOVA,  $p=0.80$ ). Sample size: Control  $n = 15$  cells (8 mice); 9m D2  $n=15$   
552 cells (7 mice); 12m D2,  $n=8$  cells (5 mice).

553

554 **Figure 6 – No loss of retinal ganglion cell somata in 11-12-month-old DBA/2J mice. A)** 2-photon  
555 Immunofluorescence images of retinal flat mounts from a 12-month-old D2-control mouse and a 12



556 month-old D2 mouse stained with antibodies for NeuN and choline acetyl transferase (ChAT). Images  
557 were acquired from central retina (centered ~500 microns from the optic nerve head) and peripheral  
558 retina (centered ~1700 microns from the optic nerve head). **B)** Analysis of ChAT<sup>+</sup> cell density (median  $\pm$   
559 IQR). Each data point is the ChAT<sup>+</sup> cell density averaged across three to four quadrants for each retina.  
560 There was no significant difference in ChAT<sup>+</sup> cell density between D2-control and D2 mice (central  
561  $p=0.44$ ; peripheral  $p=0.42$ , unpaired t-test). **C)** RGC density was measured as the difference between the  
562 total number of NeuN<sup>+</sup> cells and the number of NeuN<sup>+</sup>/ChAT<sup>+</sup> double-labeled cells. There was no  
563 significant difference between D2-control and D2 RGC density (central  $p=0.68$ ; peripheral  $p=0.93$ ,  
564 unpaired t-test). Sample sizes: D2-control,  $n=8$  retinas, 4 mice; D2,  $n=9$  retinas, 5 mice.

565

566 **Figure 7 – Treatment with brimonidine eye drops saves vGlut2 labeling in DBA/2J mice. A, B)** IOP  
567 measurements from D2 mice treated (4-5 days/week) with either lubricating eye drops **(A)** or 0.2%  
568 brimonidine tartrate eye drops **(B)** taken ~20h following previous eye treatment. Treatment started at  
569 approx. 6m of age and lasted through 9m of age. Both groups had similar IOP profiles and 8-8.5m IOP  
570 was similar between groups ( $p=0.87$ , unpaired t-test). **C)** IOP measurements before and 1h post-  
571 brimonidine treatment showing that brimonidine eye drops acutely lowered IOP ( $p=0.0011$ , paired t-  
572 test). **D, E)** Single 2-photon optical sections of vGlut2 immunofluorescence labeling of vGlut2 in dLGN of  
573 D2 mouse treated with lubricating eye drops **(D, “9m D2”)** or a mouse treated with brimonidine **(E,**  
574 **“+Brimonidine”)**. **F)** Quantification of vGlut2 puncta (mean  $\pm$  SEM) showing a higher density of RGC axon  
575 terminals in mice treated with brimonidine ( $p=0.0041$ , unpaired t-test). Sample sizes: control (lubricating  
576 eye drops group),  $n = 10$  eyes, 5 mice; brimonidine group,  $n = 18$  eyes, 9 mice.

577

578 **Bibliography**

- 579 1. Calkins DJ. Critical pathogenic events underlying progression of neurodegeneration in glaucoma.  
580 Prog Retin Eye Res. 2012 Nov;31(6):702–19.
- 581 2. Calkins DJ. Adaptive responses to neurodegenerative stress in glaucoma. Prog Retin Eye Res. 2021  
582 Sep;84:100953.
- 583 3. Weinreb RN, Aung T, Medeiros FA. The pathophysiology and treatment of glaucoma: a review.  
584 JAMA. 2014 May 14;311(18):1901–11.
- 585 4. Howell GR, Libby RT, Jakobs TC, Smith RS, Phalan FC, Barter JW, Barbay JM, Marchant JK, Mahesh  
586 N, Porciatti V, Whitmore AV, Masland RH, John SWM. Axons of retinal ganglion cells are insulated in  
587 the optic nerve early in DBA/2J glaucoma. J Cell Biol. 2007 Dec 31;179(7):1523–37.
- 588 5. Risner ML, Pasini S, Cooper ML, Lambert WS, Calkins DJ. Axogenic mechanism enhances retinal  
589 ganglion cell excitability during early progression in glaucoma. Proc Natl Acad Sci USA. 2018  
590 06;115(10):E2393–402.
- 591 6. Ou Y, Jo RE, Ullian EM, Wong ROL, Della Santina L. Selective Vulnerability of Specific Retinal  
592 Ganglion Cell Types and Synapses after Transient Ocular Hypertension. J Neurosci. 2016 Aug  
593 31;36(35):9240–52.
- 594 7. Della Santina L, Inman DM, Lupien CB, Horner PJ, Wong ROL. Differential progression of structural  
595 and functional alterations in distinct retinal ganglion cell types in a mouse model of glaucoma. J  
596 Neurosci. 2013 Oct 30;33(44):17444–57.
- 597 8. Feng L, Zhao Y, Yoshida M, Chen H, Yang JF, Kim TS, Cang J, Troy JB, Liu X. Sustained ocular  
598 hypertension induces dendritic degeneration of mouse retinal ganglion cells that depends on cell  
599 type and location. Invest Ophthalmol Vis Sci. 2013 Feb 7;54(2):1106–17.

- 600 9. Williams PA, Howell GR, Barbay JM, Braine CE, Sousa GL, John SWM, Morgan JE. Retinal ganglion  
601 cell dendritic atrophy in DBA/2J glaucoma. *PLoS ONE*. 2013;8(8):e72282.
- 602 10. Agostinone J, Di Polo A. Retinal ganglion cell dendrite pathology and synapse loss: Implications for  
603 glaucoma. *Prog Brain Res*. 2015;220:199–216.
- 604 11. Agostinone J, Alarcon-Martinez L, Gamlin C, Yu WQ, Wong ROL, Di Polo A. Insulin signalling  
605 promotes dendrite and synapse regeneration and restores circuit function after axonal injury.  
606 *Brain*. 2018 Jul 1;141(7):1963–80.
- 607 12. Belforte N, Agostinone J, Alarcon-Martinez L, Villafranca-Baughman D, Dotigny F, Cueva Vargas JL,  
608 Di Polo A. AMPK hyperactivation promotes dendrite retraction, synaptic loss, and neuronal  
609 dysfunction in glaucoma. *Mol Neurodegener*. 2021 Jun 29;16(1):43.
- 610 13. El-Danaf RN, Huberman AD. Characteristic patterns of dendritic remodeling in early-stage  
611 glaucoma: evidence from genetically identified retinal ganglion cell types. *J Neurosci*. 2015 Feb  
612 11;35(6):2329–43.
- 613 14. Bhandari A, Smith JC, Zhang Y, Jensen AA, Reid L, Goeser T, Fan S, Ghatge D, Van Hook MJ. Early-  
614 Stage Ocular Hypertension Alters Retinal Ganglion Cell Synaptic Transmission in the Visual  
615 Thalamus. *Frontiers in Cellular Neuroscience* [Internet]. 2019 Sep 19 [cited 2020 Mar 5];13.  
616 Available from: <https://www.frontiersin.org/article/10.3389/fncel.2019.00426/full>
- 617 15. Park HYL, Kim JH, Park CK. Alterations of the synapse of the inner retinal layers after chronic  
618 intraocular pressure elevation in glaucoma animal model. *Mol Brain*. 2014;7:53.

- 619 16. Park HYL, Kim SW, Kim JH, Park CK. Increased levels of synaptic proteins involved in synaptic  
620 plasticity after chronic intraocular pressure elevation and modulation by brain-derived  
621 neurotrophic factor in a glaucoma animal model. *Dis Model Mech*. 2019 18;12(6).
- 622 17. Crish SD, Sappington RM, Inman DM, Horner PJ, Calkins DJ. Distal axonopathy with structural  
623 persistence in glaucomatous neurodegeneration. *Proc Natl Acad Sci USA*. 2010 Mar  
624 16;107(11):5196–201.
- 625 18. Inman DM, Harun-Or-Rashid M. Metabolic Vulnerability in the Neurodegenerative Disease  
626 Glaucoma. *Front Neurosci*. 2017;11:146.
- 627 19. Kleesattel D, Crish SD, Inman DM. Decreased Energy Capacity and Increased Autophagic Activity in  
628 Optic Nerve Axons With Defective Anterograde Transport. *Invest Ophthalmol Vis Sci*. 2015  
629 Dec;56(13):8215–27.
- 630 20. Harder JM, Guymer C, Wood JPM, Daskalaki E, Chidlow G, Zhang C, Balasubramanian R, Cardozo  
631 BH, Foxworth NE, Deering KE, Ouellette TB, Montgomery C, Wheelock CE, Casson RJ, Williams PA,  
632 John SWM. Disturbed glucose and pyruvate metabolism in glaucoma with neuroprotection by  
633 pyruvate or rapamycin. *Proc Natl Acad Sci USA*. 2020 Dec 29;117(52):33619–27.
- 634 21. Casson RJ, Chidlow G, Crowston JG, Williams PA, Wood JPM. Retinal energy metabolism in health  
635 and glaucoma. *Prog Retin Eye Res*. 2021 Mar;81:100881.
- 636 22. Cooper ML, Crish SD, Inman DM, Horner PJ, Calkins DJ. Early astrocyte redistribution in the optic  
637 nerve precedes axonopathy in the DBA/2J mouse model of glaucoma. *Exp Eye Res*. 2016;150:22–  
638 33.

- 639 23. Jassim AH, Fan Y, Pappenhagen N, Nsiah NY, Inman DM. Oxidative Stress and Hypoxia Modify  
640 Mitochondrial Homeostasis During Glaucoma. *Antioxid Redox Signal*. 2021 Dec;35(16):1341–57.
- 641 24. Smith MA, Xia CZ, Dengler-Crish CM, Fening KM, Inman DM, Schofield BR, Crish SD. Persistence of  
642 intact retinal ganglion cell terminals after axonal transport loss in the DBA/2J mouse model of  
643 glaucoma. *J Comp Neurol*. 2016 Dec 1;524(17):3503–17.
- 644 25. Van Hook MJ, Monaco C, Bierlein ER, Smith JC. Neuronal and Synaptic Plasticity in the Visual  
645 Thalamus in Mouse Models of Glaucoma. *Front Cell Neurosci*. 2020;14:626056.
- 646 26. Bhandari A, Ward TW, Smith J, Van Hook MJ. Structural and Functional Plasticity in the  
647 Dorsolateral Geniculate Nucleus of Mice following Bilateral Enucleation. *Neuroscience*. 2022 Apr  
648 15;488:44–59.
- 649 27. Gupta N, Ly T, Zhang Q, Kaufman PL, Weinreb RN, Yücel YH. Chronic ocular hypertension induces  
650 dendrite pathology in the lateral geniculate nucleus of the brain. *Exp Eye Res*. 2007 Jan;84(1):176–  
651 84.
- 652 28. Gupta N, Yücel YH. Brain changes in glaucoma. *Eur J Ophthalmol*. 2003 Apr;13 Suppl 3:S32-35.
- 653 29. Gupta N, Greenberg G, de Tilly LN, Gray B, Polemidiotis M, Yücel YH. Atrophy of the lateral  
654 geniculate nucleus in human glaucoma detected by magnetic resonance imaging. *Br J Ophthalmol*.  
655 2009 Jan;93(1):56–60.
- 656 30. Gupta N, Ang LC, Noël de Tilly L, Bidaisee L, Yücel YH. Human glaucoma and neural degeneration in  
657 intracranial optic nerve, lateral geniculate nucleus, and visual cortex. *Br J Ophthalmol*. 2006  
658 Jun;90(6):674–8.

- 659 31. John SW, Smith RS, Savinova OV, Hawes NL, Chang B, Turnbull D, Davisson M, Roderick TH,  
660 Heckenlively JR. Essential iris atrophy, pigment dispersion, and glaucoma in DBA/2J mice. *Invest*  
661 *Ophthalmol Vis Sci*. 1998 May;39(6):951–62.
- 662 32. Libby RT, Anderson MG, Pang IH, Robinson ZH, Savinova OV, Cosma IM, Snow A, Wilson LA, Smith  
663 RS, Clark AF, John SWM. Inherited glaucoma in DBA/2J mice: pertinent disease features for  
664 studying the neurodegeneration. *Vis Neurosci*. 2005 Oct;22(5):637–48.
- 665 33. Anderson MG, Smith RS, Hawes NL, Zabaleta A, Chang B, Wiggs JL, John SWM. Mutations in genes  
666 encoding melanosomal proteins cause pigmentary glaucoma in DBA/2J mice. *Nat Genet*. 2002  
667 Jan;30(1):81–5.
- 668 34. Lambert WS, Ruiz L, Crish SD, Wheeler LA, Calkins DJ. Brimonidine prevents axonal and somatic  
669 degeneration of retinal ganglion cell neurons. *Mol Neurodegener*. 2011 Jan 13;6(1):4.
- 670 35. Conti F, Romano GL, Eandi CM, Toro MD, Rejdak R, Di Benedetto G, Lazzara F, Bernardini R, Drago  
671 F, Cantarella G, Bucolo C. Brimonidine is Neuroprotective in Animal Paradigm of Retinal Ganglion  
672 Cell Damage. *Front Pharmacol*. 2021;12:705405.
- 673 36. Scuteri D, Bagetta G, Nucci C, Aiello F, Cesareo M, Tonin P, Corasaniti MT. Evidence on the  
674 neuroprotective properties of brimonidine in glaucoma. *Prog Brain Res*. 2020;257:155–66.
- 675 37. Lindsey JD, Duong-Polk KX, Hammond D, Chindasub P, Leung CKS, Weinreb RN. Differential  
676 protection of injured retinal ganglion cell dendrites by brimonidine. *Invest Ophthalmol Vis Sci*.  
677 2015 Jan 29;56(3):1789–804.

- 678 38. Howell GR, Libby RT, Marchant JK, Wilson LA, Cosma IM, Smith RS, Anderson MG, John SWM.  
679 Absence of glaucoma in DBA/2J mice homozygous for wild-type versions of Gpnmb and Tyrp1.  
680 BMC Genet. 2007 Jul 3;8:45.
- 681 39. Dzyubenko E, Rozenberg A, Hermann DM, Faissner A. Colocalization of synapse marker proteins  
682 evaluated by STED-microscopy reveals patterns of neuronal synapse distribution in vitro. J  
683 Neurosci Methods. 2016 Nov 1;273:149–59.
- 684 40. Buckingham BP, Inman DM, Lambert W, Oglesby E, Calkins DJ, Steele MR, Vetter ML, Marsh-  
685 Armstrong N, Horner PJ. Progressive ganglion cell degeneration precedes neuronal loss in a mouse  
686 model of glaucoma. J Neurosci. 2008 Mar 12;28(11):2735–44.
- 687 41. Turner JP, Salt TE. Characterization of sensory and corticothalamic excitatory inputs to rat  
688 thalamocortical neurones in vitro. J Physiol (Lond). 1998 Aug 1;510 ( Pt 3):829–43.
- 689 42. Chen C, Regehr WG. Developmental remodeling of the retinogeniculate synapse. Neuron. 2000  
690 Dec;28(3):955–66.
- 691 43. Ting JT, Daigle TL, Chen Q, Feng G. Acute brain slice methods for adult and aging animals:  
692 application of targeted patch clamp analysis and optogenetics. Methods Mol Biol. 2014;1183:221–  
693 42.
- 694 44. Ting JT, Lee BR, Chong P, Soler-Llavina G, Cobbs C, Koch C, Zeng H, Lein E. Preparation of Acute  
695 Brain Slices Using an Optimized N-Methyl-D-glucamine Protective Recovery Method. J Vis Exp.  
696 2018 26;(132).
- 697 45. Litvina EY, Chen C. Functional Convergence at the Retinogeniculate Synapse. Neuron. 2017 Oct  
698 11;96(2):330-338.e5.

- 699 46. Hooks BM, Chen C. Distinct roles for spontaneous and visual activity in remodeling of the  
700 retinogeniculate synapse. *Neuron*. 2006 Oct 19;52(2):281–91.
- 701 47. Hooks BM, Chen C. Vision triggers an experience-dependent sensitive period at the  
702 retinogeniculate synapse. *J Neurosci*. 2008 Apr 30;28(18):4807–17.
- 703 48. Eisner DA. Pseudoreplication in physiology: More means less. *J Gen Physiol*. 2021 Feb  
704 1;153(2):e202012826.
- 705 49. Bierlein ER, Smith JC, Van Hook MJ. Mechanism for Altered Dark-Adapted Electroretinogram  
706 Responses in DBA/2J Mice Includes Pupil Dilation Deficits. *Curr Eye Res*. 2022 Jun;47(6):897–907.
- 707 50. Turner AJ, Vander Wall R, Gupta V, Klistorner A, Graham SL. DBA/2J mouse model for experimental  
708 glaucoma: pitfalls and problems. *Clin Experiment Ophthalmol*. 2017;45(9):911–22.
- 709 51. Rohowetz LJ, Mardelli ME, Duncan RS, Riordan SM, Koulen P. The Contribution of Anterior  
710 Segment Abnormalities to Changes in Intraocular Pressure in the DBA/2J Mouse Model of  
711 Glaucoma: DBA/2J-Gpnmb +/SjJ Mice as Critical Controls. *Front Neurosci*. 2021;15:801184.
- 712 52. Litvina EY, Chen C. An evolving view of retinogeniculate transmission. *Vis Neurosci*. 2017  
713 Jan;34:E013.
- 714 53. Morgan JL, Berger DR, Wetzel AW, Lichtman JW. The Fuzzy Logic of Network Connectivity in Mouse  
715 Visual Thalamus. *Cell*. 2016 Mar 24;165(1):192–206.
- 716 54. Murthy VN, Stevens CF. Reversal of synaptic vesicle docking at central synapses. *Nat Neurosci*.  
717 1999 Jun;2(6):503–7.



- 718 55. Liu M, Duggan J, Salt TE, Cordeiro MF. Dendritic changes in visual pathways in glaucoma and other  
719 neurodegenerative conditions. *Exp Eye Res.* 2011 Apr;92(4):244–50.
- 720 56. Ly T, Gupta N, Weinreb RN, Kaufman PL, Yücel YH. Dendrite plasticity in the lateral geniculate  
721 nucleus in primate glaucoma. *Vision Res.* 2011 Jan 28;51(2):243–50.
- 722 57. Howell GR, Macalinao DG, Sousa GL, Walden M, Soto I, Kneeland SC, Barbay JM, King BL, Marchant  
723 JK, Hibbs M, Stevens B, Barres BA, Clark AF, Libby RT, John SWM. Molecular clustering identifies  
724 complement and endothelin induction as early events in a mouse model of glaucoma. *J Clin Invest.*  
725 2011 Apr;121(4):1429–44.
- 726 58. Howell GR, Walton DO, King BL, Libby RT, John SWM. Datgan, a reusable software system for facile  
727 interrogation and visualization of complex transcription profiling data. *BMC Genomics.* 2011 Aug  
728 24;12:429.
- 729 59. Soto I, Oglesby E, Buckingham BP, Son JL, Roberson EDO, Steele MR, Inman DM, Vetter ML, Horner  
730 PJ, Marsh-Armstrong N. Retinal ganglion cells downregulate gene expression and lose their axons  
731 within the optic nerve head in a mouse glaucoma model. *J Neurosci.* 2008 Jan 9;28(2):548–61.
- 732 60. Keeley PW, Whitney IE, Raven MA, Reese BE. Dendritic spread and functional coverage of starburst  
733 amacrine cells. *J Comp Neurol.* 2007 Dec 10;505(5):539–46.
- 734 61. Whitney IE, Keeley PW, Raven MA, Reese BE. Spatial patterning of cholinergic amacrine cells in the  
735 mouse retina. *J Comp Neurol.* 2008 May 1;508(1):1–12.
- 736 62. Yang Q, Cho KS, Chen H, Yu D, Wang WH, Luo G, Pang IH, Guo W, Chen DF. Microbead-induced  
737 ocular hypertensive mouse model for screening and testing of aqueous production suppressants  
738 for glaucoma. *Invest Ophthalmol Vis Sci.* 2012 Jun 20;53(7):3733–41.

- 739 63. Seabrook TA, El-Danaf RN, Krahe TE, Fox MA, Guido W. Retinal input regulates the timing of  
740 corticogeniculate innervation. *J Neurosci*. 2013 Jun 12;33(24):10085–97.
- 741 64. Fujiyama F, Hioki H, Tomioka R, Taki K, Tamamaki N, Nomura S, Okamoto K, Kaneko T. Changes of  
742 immunocytochemical localization of vesicular glutamate transporters in the rat visual system after  
743 the retinofugal denervation. *J Comp Neurol*. 2003 Oct 13;465(2):234–49.
- 744 65. Land PW, Kyonka E, Shamalla-Hannah L. Vesicular glutamate transporters in the lateral geniculate  
745 nucleus: expression of VGLUT2 by retinal terminals. *Brain Res*. 2004 Jan 23;996(2):251–4.
- 746 66. Yoshida M, Satoh T, Nakamura KC, Kaneko T, Hata Y. Cortical activity regulates corticothalamic  
747 synapses in dorsal lateral geniculate nucleus of rats. *Neurosci Res*. 2009 May;64(1):118–27.
- 748 67. Koch SM, Dela Cruz CG, Hnasko TS, Edwards RH, Huberman AD, Ullian EM. Pathway-specific  
749 genetic attenuation of glutamate release alters select features of competition-based visual circuit  
750 refinement. *Neuron*. 2011 Jul 28;71(2):235–42.
- 751 68. Glock C, Heumüller M, Schuman EM. mRNA transport & local translation in neurons. *Curr Opin*  
752 *Neurobiol*. 2017 Aug;45:169–77.
- 753 69. Alvarez-Castelao B, Schuman EM. The Regulation of Synaptic Protein Turnover. *J Biol Chem*. 2015  
754 Nov 27;290(48):28623–30.
- 755 70. Cohen LD, Zuchman R, Sorokina O, Müller A, Dieterich DC, Armstrong JD, Ziv T, Ziv NE. Metabolic  
756 turnover of synaptic proteins: kinetics, interdependencies and implications for synaptic  
757 maintenance. *PLoS One*. 2013;8(5):e63191.

- 758 71. Herman MA, Ackermann F, Trimbuch T, Rosenmund C. Vesicular glutamate transporter expression  
759 level affects synaptic vesicle release probability at hippocampal synapses in culture. *J Neurosci*.  
760 2014 Aug 27;34(35):11781–91.
- 761 72. Lin YC, Koleske AJ. Mechanisms of synapse and dendrite maintenance and their disruption in  
762 psychiatric and neurodegenerative disorders. *Annu Rev Neurosci*. 2010;33:349–78.
- 763 73. El-Danaf RN, Krahe TE, Dilger EK, Bickford ME, Fox MA, Guido W. Developmental remodeling of  
764 relay cells in the dorsal lateral geniculate nucleus in the absence of retinal input. *Neural Dev*. 2015  
765 Jul 15;10:19.
- 766 74. Charalambakis NE, Govindaiah G, Campbell PW, Guido W. Developmental Remodeling of Thalamic  
767 Interneurons Requires Retinal Signaling. *J Neurosci*. 2019 May 15;39(20):3856–66.
- 768 75. Robson JA. Qualitative and quantitative analyses of the patterns of retinal input to neurons in the  
769 dorsal lateral geniculate nucleus of the cat. *J Comp Neurol*. 1993 Aug 8;334(2):324–36.
- 770 76. Deitch JS, Rubel EW. Rapid changes in ultrastructure during deafferentation-induced dendritic  
771 atrophy. *J Comp Neurol*. 1989 Mar 8;281(2):234–58.
- 772 77. Flood DG, Coleman PD. Dendritic regression dissociated from neuronal death but associated with  
773 partial deafferentation in aging rat supraoptic nucleus. *Neurobiol Aging*. 1993 Dec;14(6):575–87.
- 774 78. Dengler-Crish CM, Smith MA, Inman DM, Wilson GN, Young JW, Crish SD. Anterograde transport  
775 blockade precedes deficits in retrograde transport in the visual projection of the DBA/2J mouse  
776 model of glaucoma. *Front Neurosci*. 2014;8:290.
- 777 79. Liu H, Prokosch V. Energy Metabolism in the Inner Retina in Health and Glaucoma. *IJMS*. 2021 Apr  
778 1;22(7):3689.

- 779 80. Galanopoulos A, Goldberg I. Clinical efficacy and neuroprotective effects of brimonidine in the  
780 management of glaucoma and ocular hypertension. *Clin Ophthalmol.* 2009;3:117–22.
- 781 81. Doozandeh A, Yazdani S. Neuroprotection in Glaucoma. *J Ophthalmic Vis Res.* 2016 Jun;11(2):209–  
782 20.
- 783 82. Levin LA, Crowe ME, Quigley HA, Lasker/IRRF Initiative on Astrocytes and Glaucomatous  
784 Neurodegeneration Participants. Neuroprotection for glaucoma: Requirements for clinical  
785 translation. *Exp Eye Res.* 2017 Apr;157:34–7.
- 786
- 787
- 788
- 789
- 790
- 791
- 792

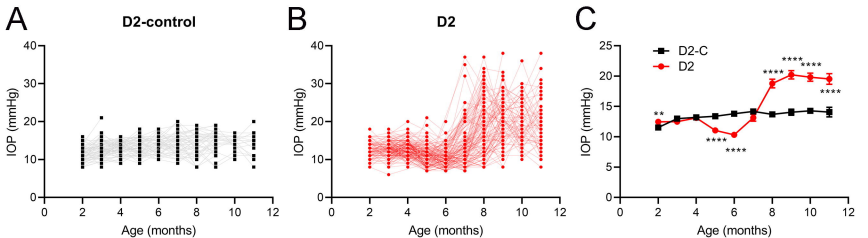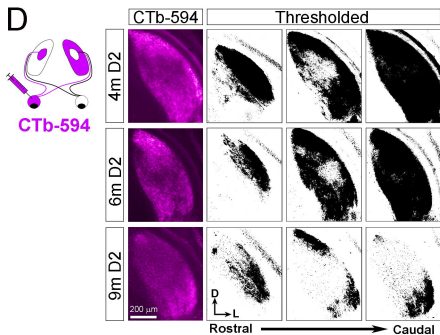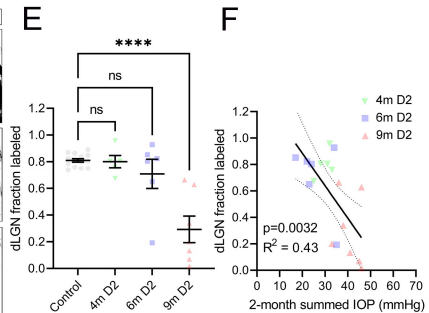

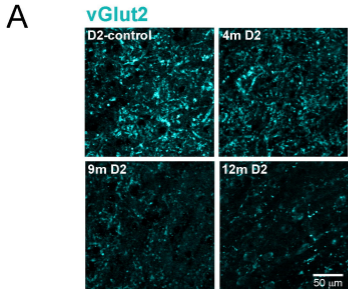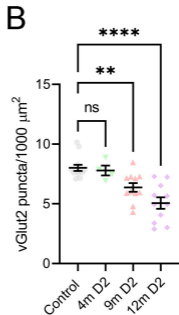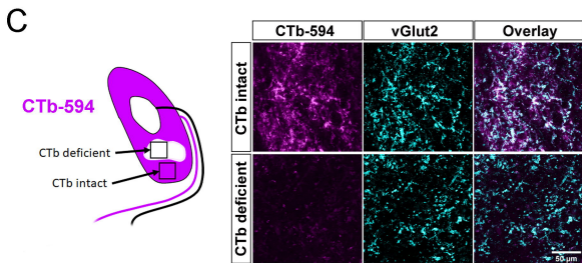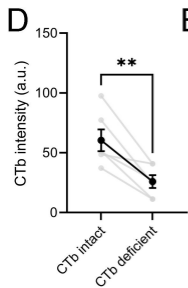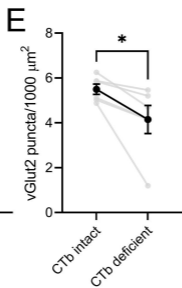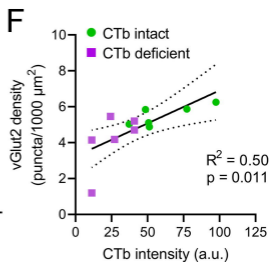

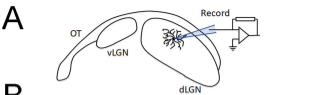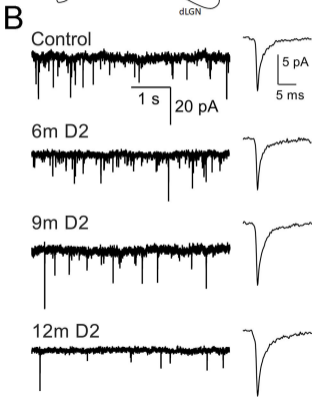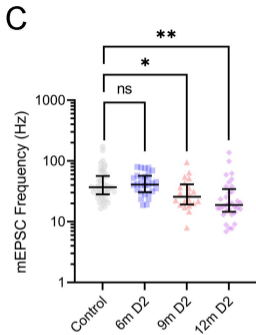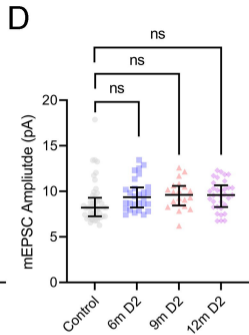

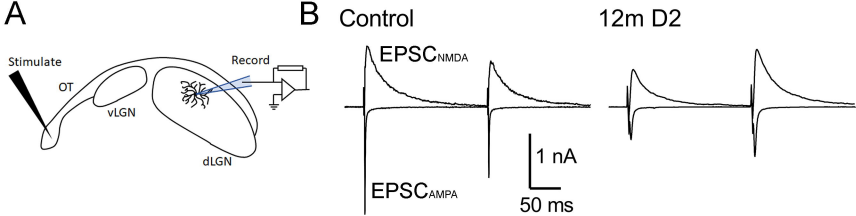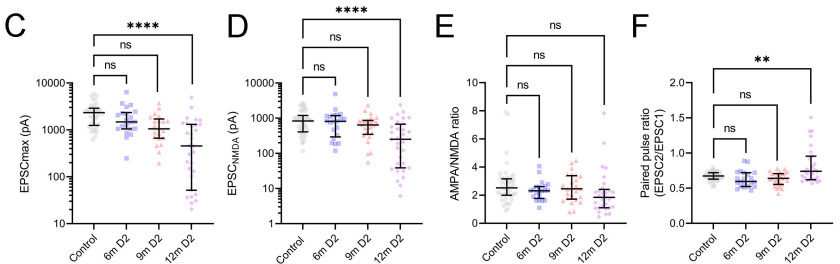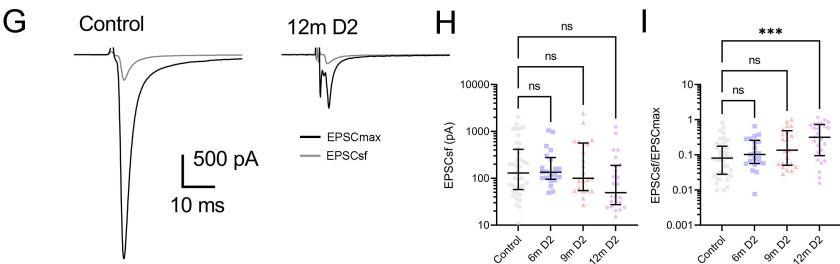



**A Control**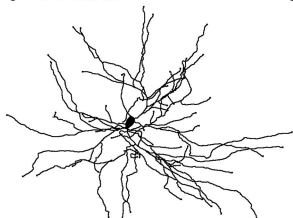**B 9m D2**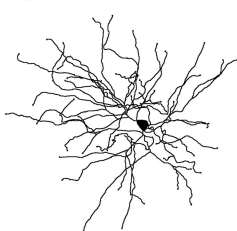**C 12m D2**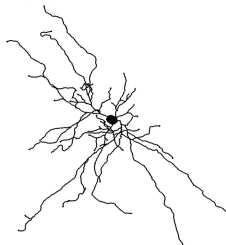**D**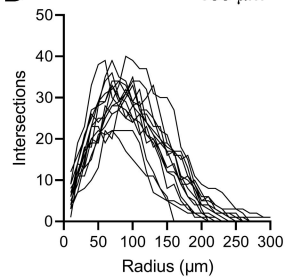**E**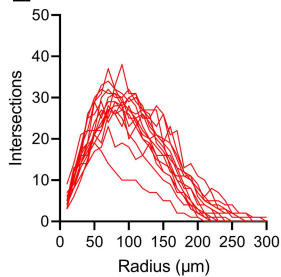**F**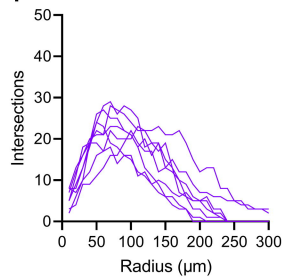**G**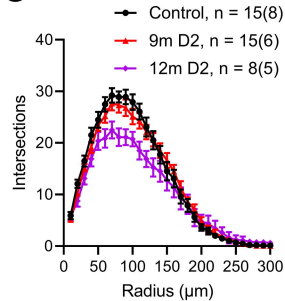**H**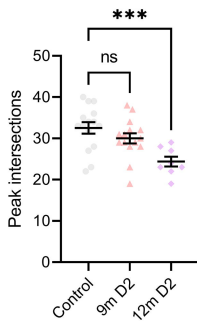**I**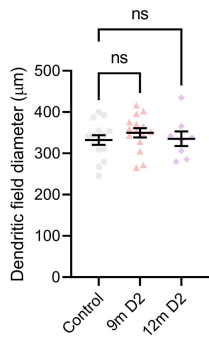

**A**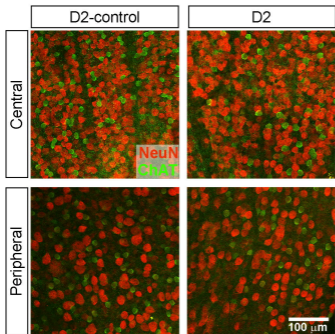**B**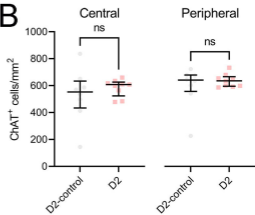**C**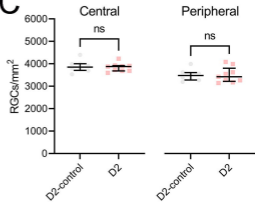

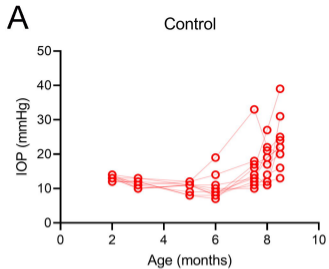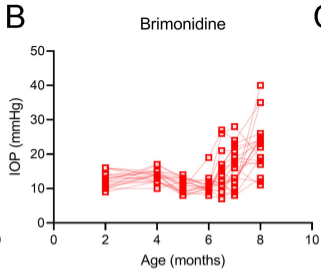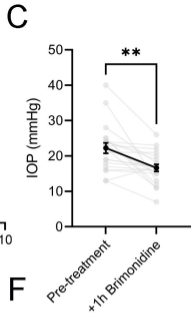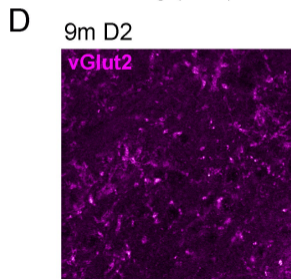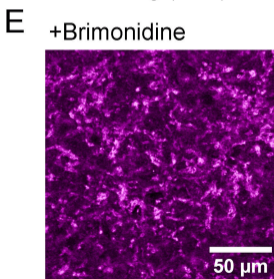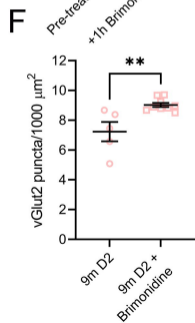

Source: https://www.biorxiv.org/content/10.1101/2022.08.15.503974v1.full.pdf
